# Supplementary material for: Identifying Plasmodium P36 and P52 antigens for co-administration with circumsporozoite protein to enhance vaccine efficacy
Source: PubMed Central journal article supplement (PMC11469399; doi:10.21203/rs.3.rs-4909396/v1), 2024-09-24
Supplement: NIHPPRS4909396V1-supplement-1.pdf [file NIHPPRS4909396V1-supplement-1.pdf]

## Supplementary Files

This is a list of supplementary files associated with this preprint. Click to download.

- [SupplementaryInformationYadavetal.pdf](#)
